# Supplementary material for: Understanding the physical breakdown and catechin bioaccessibility of third generation extruded snacks enriched with catechin using the human gastric simulator
Source: Royal Society of Chemistry journal article supplement (doi:10.1039/d3fo03857b), 2023-12-19
Supplement: d3fo03857b1.pdf [file d3fo03857b1.pdf]

A)

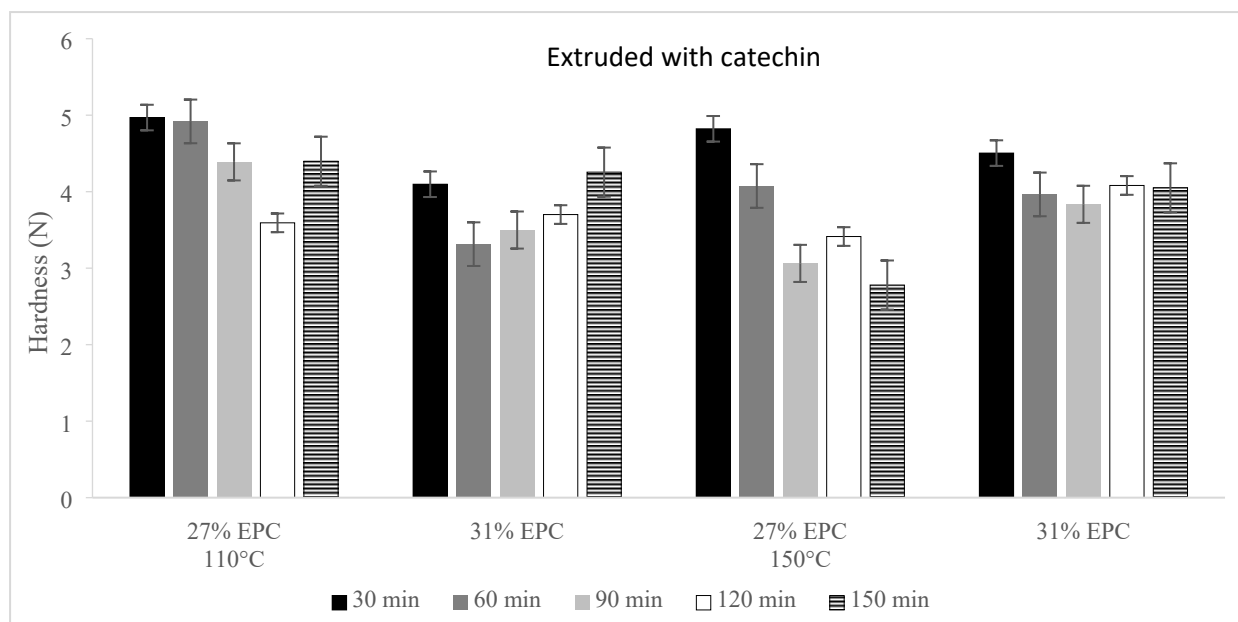

B)

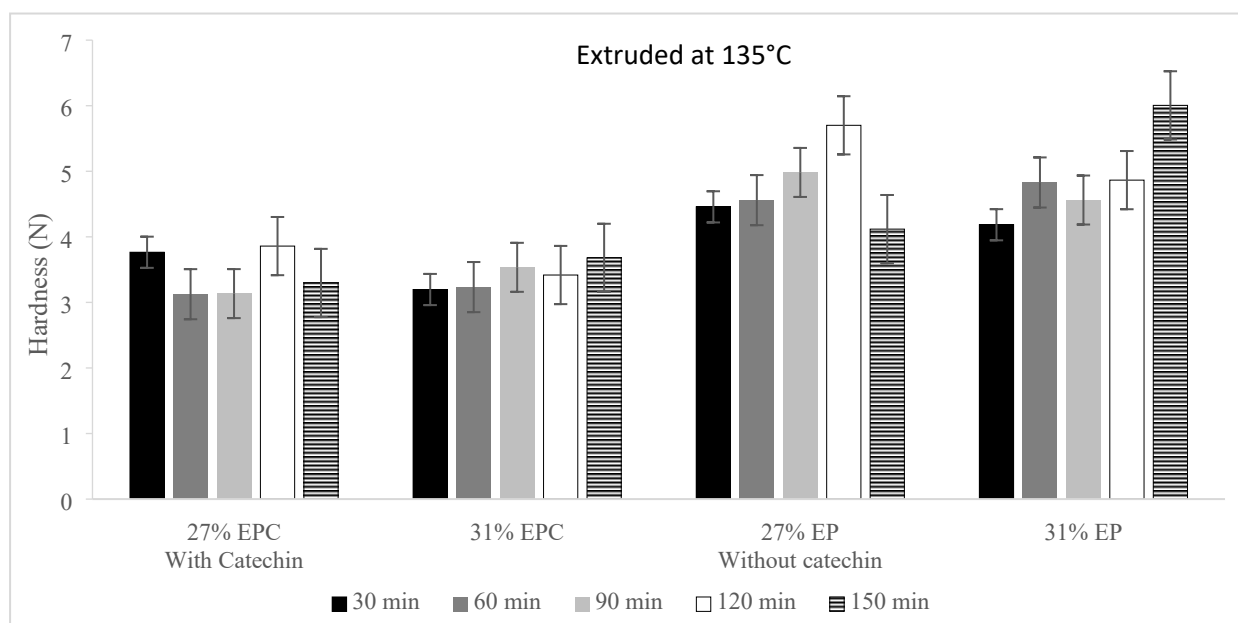

**Supplemental Figure 1.** A and B) Hardness of emptied gastric digesta from the HGS every 30 min up to 150 min (digestion time) of expanded products enriched with and without catechin at different moisture levels (27 or 31%) and processed using different extrusion temperatures (110, 135, or 150°C). Results are expressed as mean (n=3) ± 95% confidence interval.

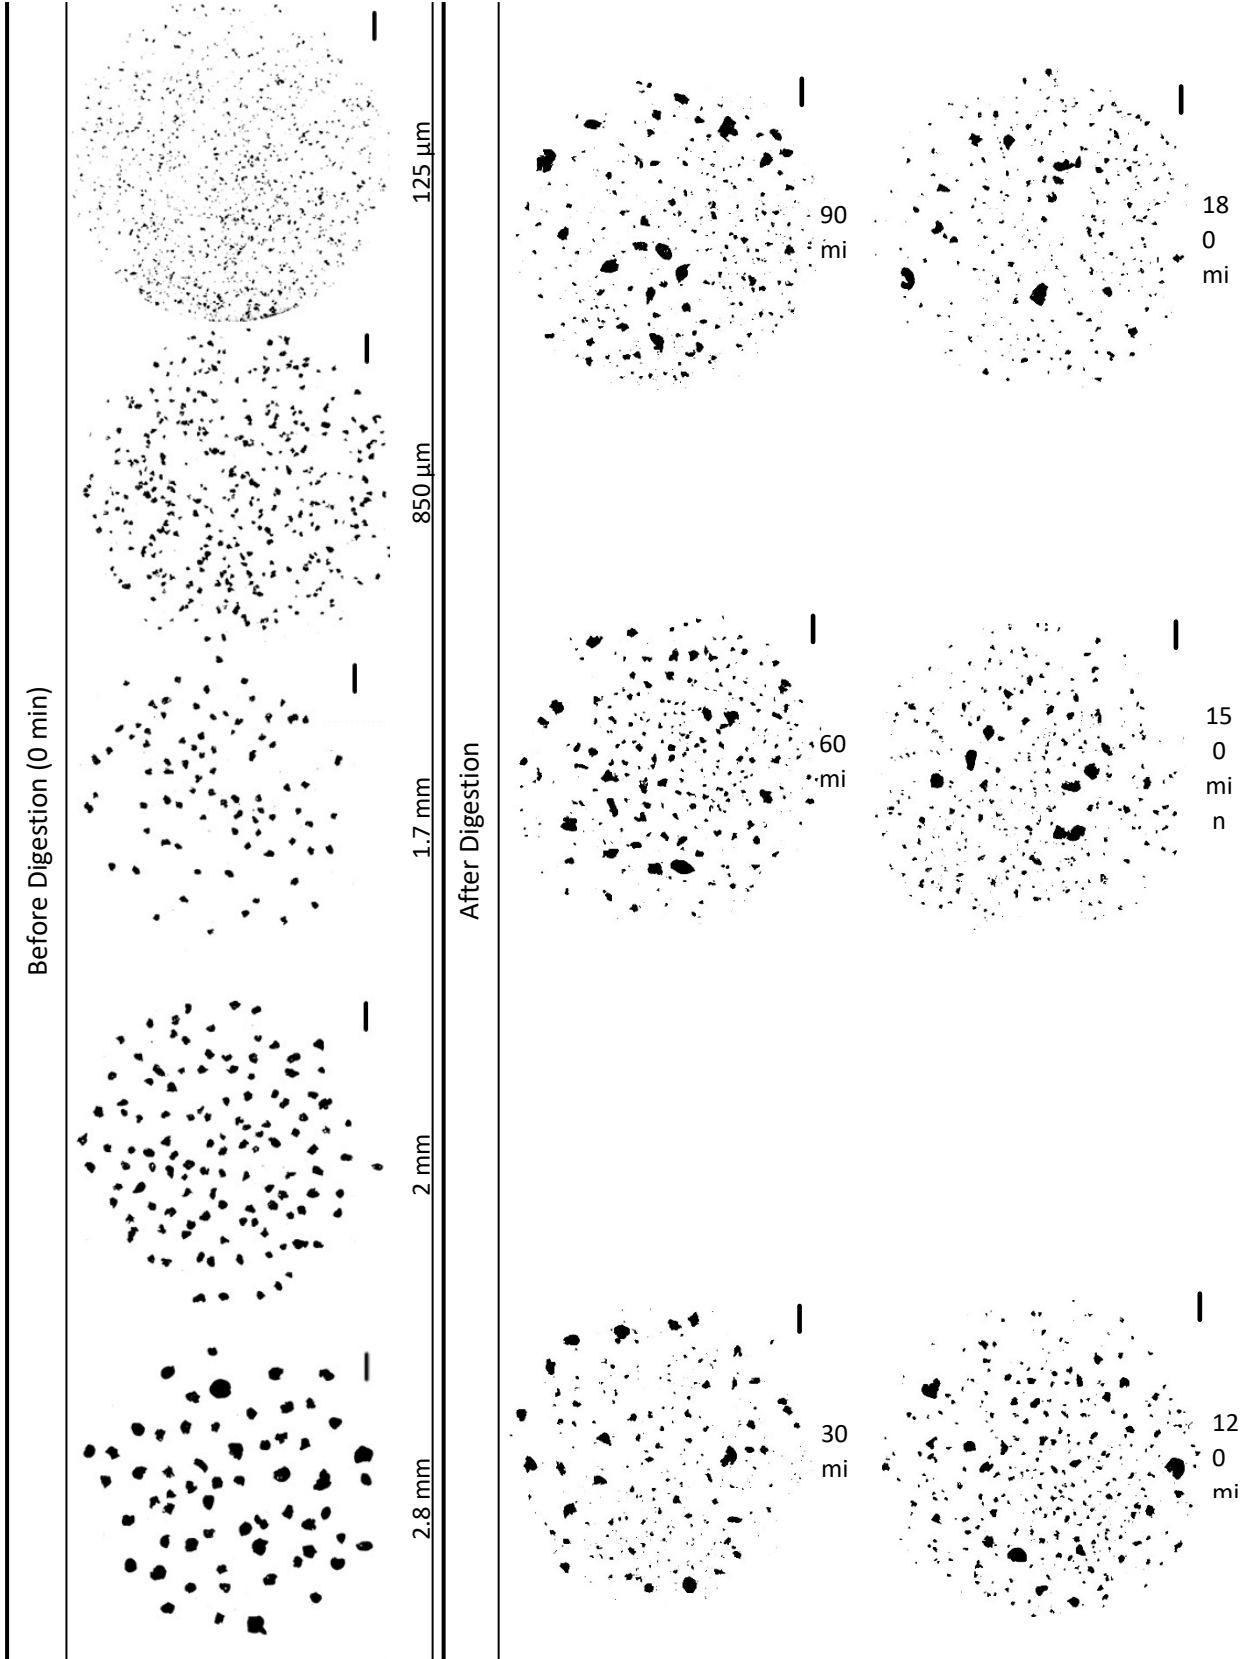

**Supplemental Figure 2** Examples of binary images of extruded 3G snacks (previously sieved) and gastric digesta used for extraction of particle size parameters for the expanded product at 27% moisture content and 150°C before digestion and after 30 up to 180 min gastric digestion. The scale bar represents 1 cm and is the same for all images.

**Supplemental Table 1** Particle size parameters (x50 and b derived from the Rosin-Rammler equation <sup>41</sup>) after gastric digestion (30 min up to 180 min) of the expanded products enriched with (EPC) and without catechin (EP) at different moisture levels (27 or 31%) and processed using different extrusion temperatures (110, 135, or 150°C). Values shown are mean (n=3) ± 95% confidence interval.

| T     | 110°C                                             |           | 135°C      |            |             |            | 150°C      |            |
|-------|---------------------------------------------------|-----------|------------|------------|-------------|------------|------------|------------|
| M     | 27% EPC                                           | 31% EPC   | 27% EPC    | 31% EPC    | 27% EP      | 31% EP     | 27% EPC    | 31% EPC    |
| (min) | Median particle area [X50 (mm <sup>2</sup> )]     |           |            |            |             |            |            |            |
| 0     | 4.79±0.07                                         | 7.57±0.2  | 15.46±4.94 | 15.38±6.6  | 12.07±4.43  | 12.55±3.76 | 6.36±0.64  | 6.42±0.99  |
| 30    | 6.84±0.87                                         | 6.99±0.78 | 4.92±0.97  | 4.8±1.05   | 5.31±0.96   | 8.65±1.65  | 9.02±1.64  | 5.62±1.02  |
| 60    | 6.5±0.9                                           | 6.6±0.8   | 5.87±1.18  | 5.54±0.56  | 8.1±1.32    | 7.82±0.9   | 6.5±1      | 6.57±1     |
| 90    | 7.75±1.16                                         | 7.7±1.8   | 5.8±1.14   | 6.91±1.2   | 8.12±1.31   | 7.59±1.27  | 7.72±0.88  | 5.96±0.99  |
| 120   | 7.69±1.25                                         | 8.25±1.4  | 5.31±0.5   | 5.95±1.23  | 12.93±3.45  | 8.65±3.27  | 11.17±4.6  | 7.5±1.17   |
| 150   | 6.62±1.18                                         | 7.72±1.26 | 7.1±2.07   | 7.99±1.45  | 10.62±4.67  | 7.81±1.92  | 7.68±2.08  | 7.7±2.02   |
| 180   | 6.65±2.61                                         | 8.97±3.08 | 5.14±3.69  | 6.29±1.48  | 9.73±3.09   | 5.07±0.8   | 5.82±2.1   | 10.65±4.23 |
|       | Distribution breadth constant [b (dimensionless)] |           |            |            |             |            |            |            |
| 0     | 0.55±0.09                                         | 0.52±0.09 | 0.42±0.07  | 0.43±0.19  | 0.28±0.1    | 0.31±0.06  | 0.57±0.1   | 0.5±0.15   |
| 30    | 4.11±0.78                                         | 3.65±0.46 | 3.07±1.02  | 4.23±0.59  | 3.32±0.69   | 2.84±0.51  | 3.95±0.53  | 4.37±0.34  |
| 60    | 4.47±0.67                                         | 5.43±0.33 | 3.22±0.95  | 4.54±0.57  | 3.21±0.65   | 2.98±0.41  | 5.91±0.85  | 5.56±0.52  |
| 90    | 4.47±0.56                                         | 5.93±1.05 | 3.48±0.56  | 4.15±0.41  | 3.95±0.93   | 3.82±0.99  | 5.86±1.02  | 5.99±0.67  |
| 120   | 6.13±1.53                                         | 6.1±1.52  | 4.47±0.87  | 6.04±1.3   | 5.99±2.56   | 7.25±5.96  | 6.4±2.7    | 5.52±0.45  |
| 150   | 7.4±0.88                                          | 5.8±0.52  | 4.94±1.48  | 6.15±1.07  | 8.55±3.48   | 4.63±1.16  | 6.77±1.33  | 6.76±0.52  |
| 180   | 16.42±6.89                                        | 6.43±1.87 | 5.47±1.54  | 11.33±4.06 | 26.88±14.56 | 7.3±2.54   | 14.93±9.55 | 5.39±0.75  |
|       | Number of particles/g dry matter (dimensionless)  |           |            |            |             |            |            |            |
| 0     | 4689±2786                                         | 3853±370  | 4429±3158  | 2811±1017  | 2149±1006   | 2116±727   | 3740±1225  | 3990±1238  |
| 30    | 1863±190                                          | 2258±293  | 4441±882   | 4447±1399  | 3750±826    | 2072±446   | 1285±171   | 2218±297   |
| 60    | 1834±316                                          | 1900±159  | 3632±675   | 2933±851   | 2299±509    | 2202±367   | 1698±410   | 1974±299   |
| 90    | 1642±334                                          | 1689±286  | 2946±314   | 2757±546   | 2215±587    | 2215±468   | 1702±298   | 2051±295   |
| 120   | 1633±343                                          | 1540±275  | 3269±606   | 2560±405   | 1658±495    | 1809±425   | 1321±417   | 1764±282   |
| 150   | 2357±437                                          | 1652±249  | 2919±685   | 2161±535   | 3327±1986   | 2542±632   | 2160±799   | 2189±351   |
| 180   | 2812±708                                          | 2368±722  | 6512±2440  | 3389±752   | 5191±3965   | 3353±720   | 3353±604   | 2366±1259  |

\*DG= digestion time

**Supplemental Table 2** Digestion time used for analysis of the total starch hydrolysis analysis was the combination of gastric digestion plus small intestinal digestion. 0 min intestinal time (first row) represents samples taken directly after the gastric phase with no intestinal digestion. Values from all samples with the same total gastrointestinal time was summed to determine the total starch hydrolysis at each time.

|                   |  | Gastrointestinal time (min) |        |        |         |         |         |
|-------------------|--|-----------------------------|--------|--------|---------|---------|---------|
| Gastric Time →    |  | 30 min                      | 60 min | 90 min | 120 min | 150 min | 180 min |
| Intestinal Time ↓ |  | G+I                         | G+I    | G+I    | G+I     | G+I     | G+I     |
| 0 min             |  | 30                          | 60     | 90     | 120     | 150     | 180     |
| 30 min            |  | 60                          | 90     | 120    | 150     | 180     | 210     |
| 60 min            |  | 90                          | 120    | 150    | 180     | 210     | 240     |
| 90 min            |  | 120                         | 150    | 180    | 210     | 240     | 270     |
| 120 min           |  | 150                         | 180    | 210    | 240     | 270     | 300     |
| 150 min           |  | 180                         | 210    | 240    | 270     | 300     | 330     |
| 180 min           |  | 210                         | 240    | 270    | 300     | 330     | 360     |
